# Supplementary material
Source: publisher site journal article supplement (https://www.dovepress.com/article/572421)
Supplement: Supplementary file 1 [file 572421%20Appendix.docx]

**Appendix**

Box A.1: MEDLINE and EMBASE search strategy

| - **Ovid MEDLINE** - 1 (simulation* or simulator*).ti,ab. AND   (learn* or train* or skill* or educat* or transfer or performance).ti,ab. AND  ((Cardiac or Cardio* or heart) adj2 (surg*)).ti,ab.   - 2 exp Simulation Training/ AND   exp Cardiac Surgical Procedures/   - 3 exp Education, Medical, Graduate/ AND   exp Cardiac Surgical Procedures/ AND  (simulation* or simulator*).ti,ab. AND  (learn* or skill* or train* or educat* or transfer or performance).ti,ab. |
| --- |
| - **EMBASE** - 1 (simulation* or simulator*).ti,ab. AND   (learn* or train* or skill* or educat* or transfer or performance).ti,ab. AND  ((Cardiac or Cardio* or heart) adj2 (surg*)).ti,ab.   - 2 exp simulation training/ AND   exp heart surgery/   - 3 exp Education, Medical, Graduate/ AND   exp Heart Surgery/ AND  (simulation* or simulator*).ti,ab. AND  (learn* or skill* or train* or educat* or transfer or performance).ti,ab. |

Table A.1: Characteristics of included studies

| **#** | **Author** | **Year /**  **Country** | **Publication type** | **Simulator(s)** | **Simulation modality** | **Surgical competency / Skill** | **Outcomes** |
| --- | --- | --- | --- | --- | --- | --- | --- |
| 1 | Allan et al.46 | 2013  USA | Single group  Pre-post test | ECMO skills trainer (vessel cannulation trainer with infant mannequin) | Integrated bench-top models in a simulated reality (resuscitation in intensive care unit) | Perform jugular and carotid cannulation  and starting ECMO | Performance of ECMO cannulation technical skills and time from decision to actual ECMO run |
| 2 | Baker et al.25 | 2012  USA | Single group  Mixed methods study | Synthetic vessels procedural trainer (Chamberlain group) | Bench-top | Coronary artery anastomosis | Performance of technical skills and knowledge assessment |
| Inanimate aortic and mitral valve models (Chamberlain group) | Bench-top | AVR, MVR |
| Inanimate saphenous vein harvest model (Chamberlain group) | Bench-top | Saphenous vein harvest |
| Tissue cadaver | Simulated operative procedure | Redo sternotomy ITA harvest Aortic valve resuspension Total arch replacement Endoscopic vein harvest LVAD placement Minimally invasive MVR & AVR |
| Ramphal cardiac surgery simulator | High technology, porcine  heart, complex simulator | Coronary artery anastomosis AVR, management of small aortic root MVR, atrial fibrillation surgical management MV and TV repair Root replacement, homograft Valve-sparing root replacement Weaning off CPB |
| 3 | Burkhart et al.30 | 2010  USA | Single group  Pre-post test | Orpheus simulator (Ulco Technologies, Marrickville, New South Wales, Australia) | High technology, high complexity  perfusion simulator | Cardiopulmonary bypass management | Ability to manage CPB and  certain emergencies |
| 4 | Burkhart et al.32 | 2013  USA | Single group  Pre-post test | Extracorporeal membrane oxygenation ECMO circuit Air Man mannequin | Simulated ECMO circuit | Identification and management of ECMO crisis scenarios | Confidence of residents in dealing with crisis scenarios  Knowledge and management of ECMO |
| 5 | Cristancho et al.29 | 2012  Canada | Observational study | Knot-tying prototype with Penrose drains  for suturing | Bench-top | Perform off-pump coronary artery bypass (knot tying, suture of anastomosis) | Performance of technical skills, non-technical skills, and interaction with the team in crisis in advanced levels |
| Inanimate plastic heart with a plastic tube for vascular anastomosis | Bench-top | Perform off-pump coronary artery bypass (perform complete distal and proximal coronary anastomosis on still heart) |
| Mechanical model for beating heart surgery with a plastic tube for vascular anastomosis | High-technology complex simulator | Perform off-pump coronary artery bypass (distal anastomosis on beating heart, perform heart enucleation then perform distal anastomosis) |
| 6 | Enter et al.16 | 2015  USA | Single group  Pre-post test | Inanimate vessel anastomosis model | Bench-top | Perform end-side coronary anastomosis | Performance of technical skills |
| 7 | Fann et al.37 | 2008  USA | Single group  Pre-post test | Synthetic vessels station | Bench-top | End-side coronary anastomosis | Practice anastomosis at home  Performance of technical skill of anastomoses on beating heart |
| Chamberlain heart simulator | High technology, beating synthetic  heart, complex simulator | End-side coronary anastomosis  on beating heart model |
| 8 | Fann et al.33 | 2010  USA | Single group  Pre-post test | Synthetic vessels station | Bench-top | End-side coronary anastomosis | Performance of full end-to-side anastomosis |
| Porcine heart | Bench-top | Distal and proximal coronary  graft anastomoses |
| 9 | Fouilloux et al.22 | 2015  France | RCT | Animate sheep heart and aorta | Bench-top Pressurized heart and aorta | Practice aortic cannulation | Knowledge, technical, non-technical skills, and critical thinking skills |
| Swine, live animals Cardiopulmonary bypass pump | Simulated operative procedure | Practice full CPB run with an operative team |
| Swine, live animals Cardiopulmonary bypass pump | Simulated operative procedure | Practice CPB run with an operative team Management of CPB crisis scenarios |
| 10 | Greenhouse et al.21 | 2013  USA | Single group  Post-test only | MVR skill training station | Bench-top | Perform MVR (suture placement, valve  placement and knot tying) | Performance of technical aspects of MVR |
| 11 | Helder et al.17 | 2016  USA | Single group  Post-test only | Animate porcine heart | Bench-top | Perform end-end aortic anastomosis | Performance of technical skills in aortic anastomosis |
| Dacron graft | Bench-top | Perform end-end aortic anastomosis |
| 12 | Hermsen et al.23 | 2018  USA | Single group  Pre-post test | 3D printed heart with real anatomical details | Simulated operative procedure | Perform septal myomectomy after identification of diseased part | Procedural steps and knowledge  Technical and non-technical skills and anatomical identification of disease |
| 13 | Hicks et al.27 | 2011  USA | Single group  Post-test only | Perfused non-beating porcine heart and aorta | Partial-task trainer, benchtop | Arterial and venous cannulation | Performance of technical skills of cannulation  Communicating with perfusionist  Management of CPB and emergency scenarios |
| Orpheus simulator (Ulco Technologies, Marrickville, New South Wales, Australia) | High-technology complex simulator | Management of cardiopulmonary bypass  Dealing with bypass crisis scenarios |
| Ramphal cardiac surgery simulator | High technology, beating porcine  heart, complex simulator | Arterial and venous cannulation Management of CPB |
| 14 | Ito et al.28 | 2013  Japan | Validation study  Single group  Post-test only | BEAT, YOUCAN simulator Inanimate synthetic arteries on a moving station | Bench-top, electrically driven | Perform end-side coronary anastomosis on beating heart (platform) | Performance of simulator to practice coronary anastomosis |
| 15 | Joyce et al.26 | 2011  USA | Single group  Pre-post test | Inanimate mitral valve model (Chamberlain group) | Bench-top | Performing mitral annuloplasty | Open practice to perform annuloplasty  Technical skill to perform annuloplasty |
| Porcine heart | Bench-top | Assessment of mitral valve Performing mitral annuloplasty |
| 16 | Joyce et al.31 | 2018  USA | Single group  Post-test only | Simulated OR including Orpheus simulator, coronary bypass, AVR and mitral repair models and CPB pump | Advanced simulated OR | Coronary artery bypass, AVR, MV repair Cardiopulmonary bypass | Technical skills, knowledge, and management of CPB crisis  Communication with perfusionists |
| 17 | Liu et al.36 | 2016  China | Observational study | Swine, live animals | Simulated operative procedure | Left internal thoracic harvest and off-pump coronary anastomosis training | Performance of off-pump coronary anastomosis |
| 18 | Mavroudis et al.47 | 2018  USA | Observational study | Neonatal piglets’ hearts | Simulated operative procedure | Perform various congenital  cardiac surgery procedures | Designed to teach congenital procedures to non-congenital cardiac surgery trainees |
| 19 | Price et al.15 | 2011  Canada | RCT | Synthetic arteries procedural trainer (Limbs & Things, Savannah, Ga) | Bench-top | End-side coronary anastomosis | Deliberate practice  Performance and completion of coronary anastomosis on live animal |
| Porcine artery, live animal | Simulated operative procedure | End-side coronary anastomosis |
| 20 | Sardari et al.24 | 2020  Netherlands | Single group  Pre-post test | 3D printed mitral valve within a simulated torso with computerized monitoring | Simulated procedure Bench-top | Endoscopic mitral valve repair | Performance of technical skills for placing annuloplasty sutures and theoretical knowledge |
| 21 | Smelt et al.38 | 2016  UK | RCT | Orpheus simulator (Ulco Technologies,  Marrickville, New South Wales, Australia) | High-technology complex simulator | Management of cardiopulmonary bypass  Dealing with bypass crisis scenarios | Knowledge and management of  CPB crisis scenarios |
| 22 | Spooner et al.18 | 2019  Canada | Observational study | Swine, live animals | Simulated operative procedure | Perform cardioectomy and  heart transplantation | Designed to teach heart transplantation surgical skills to trainees |
| 23 | Tavlasoglu et al.35 | 2015  Turkey | Non-randomized  Three groups | Animate bovine heart | Bench-top | Perform distal coronary anastomosis | Performance of technical skills, and anastomosis quality |
| 24 | Tavlasoglu et al.34 | 2013  Turkey | Non-randomized  Two groups | Animate bovine heart | Simulated procedure Bench-top | Mitral valve repair | Performance of technical skill by measuring procedural success |
| 25 | Valdis et al.20 | 2016  Canada | RCT | da Vinci surgical system (Intuitive Surgical, Sunnyvale, CA) with an animate porcine model | Surgical robot with an animal model | Perform ITA harvest and mitral annuloplasty | Performance of technical skills of ITA harvest and mitral annuloplasty |
| da Vinci surgical system (Intuitive Surgical, Sunnyvale, CA) | Surgical robot with inanimate models | Camera movement, peg transfer,  intracorporeal knot tying |
| da Vinci surgical system (Intuitive Surgical, Sunnyvale, CA) | Surgical robot with virtual reality  simulation exercises | Robot simulation exercises (not resembling the primary surgical procedure) |
| 26 | Zhang et al.19 | 2018  China | Single group  Post-test only | Swine, live animals | Simulated operative procedure | Implant left ventricular assist device LVAD without cardiopulmonary bypass | Team performance, addressing emergency situations and success rate of the procedure |

ECMO = Extracorporeal Membrane Oxygenation; AVR = Aortic Valve Replacement; MVR = Mitral Valve Replacement; TV = Tricuspid valve, LVAD = Left Ventricular Assist Device; RCT = Randomized Controlled Trial; ITA = Internal Thoracic Artery; CPB = Cardiopulmonary Bypass; OR = Operating Room
